# Supplementary material for: Preparation of monodisperse cerium oxide particle suspensions from a tetravalent precursor
Source: Royal Society of Chemistry journal article supplement (doi:10.1039/d4dt00146j), 2024-01-01
Supplement: d4dt00146j1.pdf [file d4dt00146j1.pdf]

Supporting Information for:

## Preparation of Monodisperse Cerium Oxide Particle Suspensions from a Tetravalent Precursor

Ashley M. Hastings,<sup>1</sup> Susana Herrera,<sup>2</sup> Sharee Harris,<sup>3</sup> Tashi Parsons-Davis,<sup>1</sup> Andrew J. Pascall,<sup>4</sup> and Jennifer A. Shusterman<sup>1\*</sup>

<sup>1</sup>*Nuclear and Chemical Sciences Division, Lawrence Livermore National Laboratory, Livermore, CA 94550, USA*

<sup>2</sup>*Florida International University, Miami, FL 33199, USA. Pacific Northwest National Laboratory, Richland, WA 99352, USA*

<sup>3</sup>*Materials Science Division, Lawrence Livermore National Laboratory, Livermore, CA 94550, USA*

<sup>4</sup>*Materials Engineering Division, Lawrence Livermore National Laboratory, Livermore, CA 94550, USA*

\*corresponding author | email: [shusterman1@llnl.gov](mailto:shusterman1@llnl.gov)

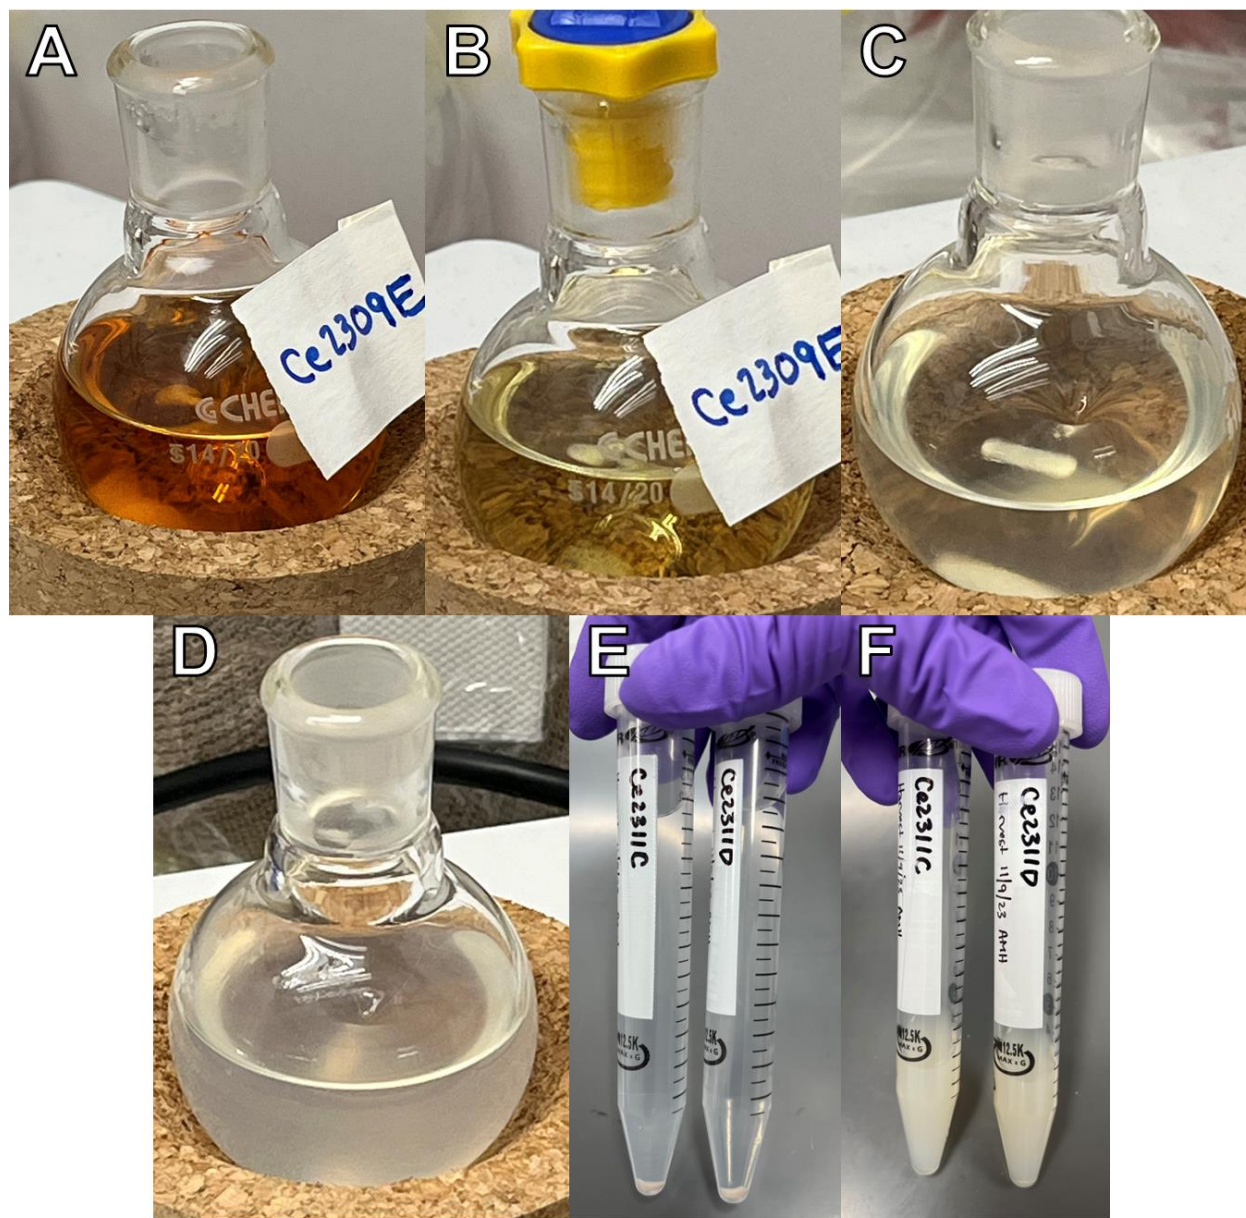

Figure S1. Photos from the Ce particle synthesis. A) Cerium solution added to a mixture of water, ethanol, and HMT. B) After 15 minutes of stirring. C) After pH adjusting from  $\sim 1.1$  to 1.4. D) Cloudiness indicating initial particle formation ( $1.5 < \text{pH} < 7.5$ ). E) Particle pellets centrifuged with ethanol wash. F) Washed Ce particles in ethanol suspension.

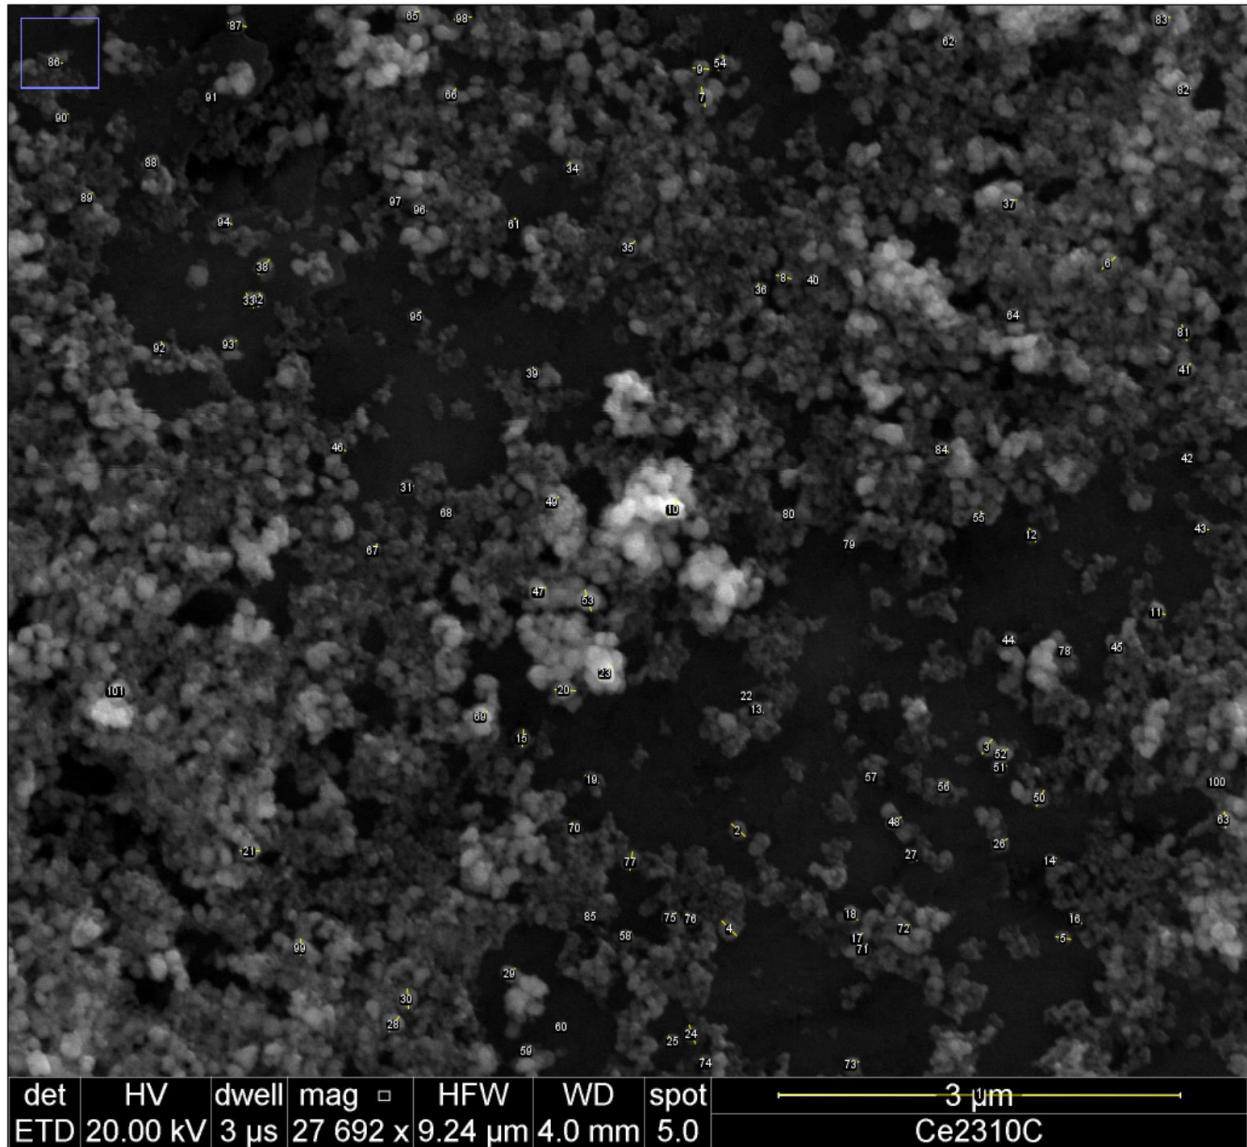

Figure S2. Scanning electron micrograph of cerium particles synthesized at pH 1.9. The 100 particles sampled for particle size through ImageJ are shown.

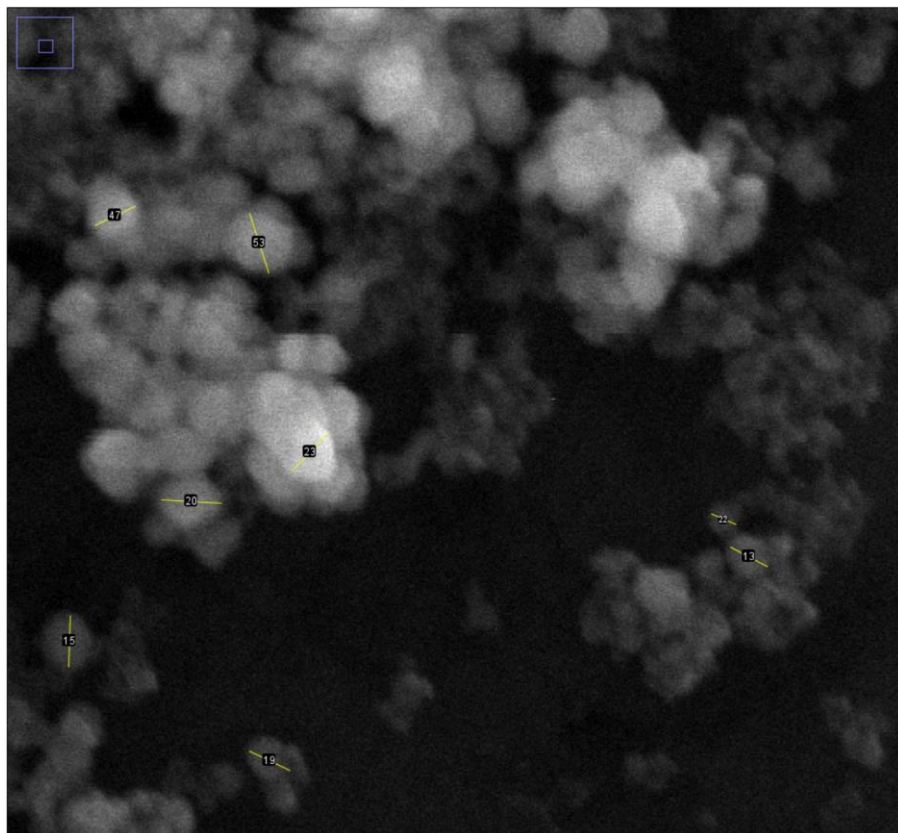

Figure S3. Magnified inset of micrograph from Figure S2 to highlight a sampling of particle diameter line selections in ImageJ software.

Table S1. Compilation of the particle diameter measurements from Image J. Line #1 (not included) indicates the 3  $\mu\text{m}$  scale bar from the scanning electron micrograph.

| Particle                                | Diameter (nm) | Particle | Diameter (nm) | Particle | Diameter (nm) | Particle | Diameter (nm) | Particle                       | Diameter (nm) |
|-----------------------------------------|---------------|----------|---------------|----------|---------------|----------|---------------|--------------------------------|---------------|
| 2                                       | 134           | 22       | 69            | 42       | 90            | 62       | 81            | 82                             | 92            |
| 3                                       | 129           | 23       | 137           | 43       | 96            | 63       | 113           | 83                             | 120           |
| 4                                       | 153           | 24       | 141           | 44       | 99            | 64       | 87            | 84                             | 103           |
| 5                                       | 111           | 25       | 99            | 45       | 98            | 65       | 112           | 85                             | 88            |
| 6                                       | 131           | 26       | 119           | 46       | 111           | 66       | 105           | 86                             | 109           |
| 7                                       | 142           | 27       | 105           | 47       | 115           | 67       | 101           | 87                             | 139           |
| 8                                       | 113           | 28       | 132           | 48       | 118           | 68       | 77            | 88                             | 88            |
| 9                                       | 118           | 29       | 100           | 49       | 113           | 69       | 109           | 89                             | 96            |
| 10                                      | 143           | 30       | 149           | 50       | 129           | 70       | 93            | 90                             | 94            |
| 11                                      | 118           | 31       | 94            | 51       | 94            | 71       | 94            | 91                             | 80            |
| 12                                      | 109           | 32       | 99            | 52       | 106           | 72       | 94            | 92                             | 100           |
| 13                                      | 107           | 33       | 115           | 53       | 161           | 73       | 113           | 93                             | 111           |
| 14                                      | 103           | 34       | 114           | 54       | 117           | 74       | 95            | 94                             | 108           |
| 15                                      | 131           | 35       | 121           | 55       | 91            | 75       | 109           | 95                             | 106           |
| 16                                      | 106           | 36       | 103           | 56       | 100           | 76       | 99            | 96                             | 104           |
| 17                                      | 99            | 37       | 99            | 57       | 45            | 77       | 141           | 97                             | 96            |
| 18                                      | 118           | 38       | 129           | 58       | 96            | 78       | 99            | 98                             | 124           |
| 19                                      | 115           | 39       | 95            | 59       | 90            | 79       | 85            | 99                             | 122           |
| 20                                      | 154           | 40       | 68            | 60       | 65            | 80       | 74            | 100                            | 85            |
| 21                                      | 149           | 41       | 110           | 61       | 88            | 81       | 117           | 101                            | 112           |
| <b>Average <math>\pm 2\sigma</math></b> |               |          |               |          |               |          |               | <b>108 <math>\pm 41</math></b> |               |

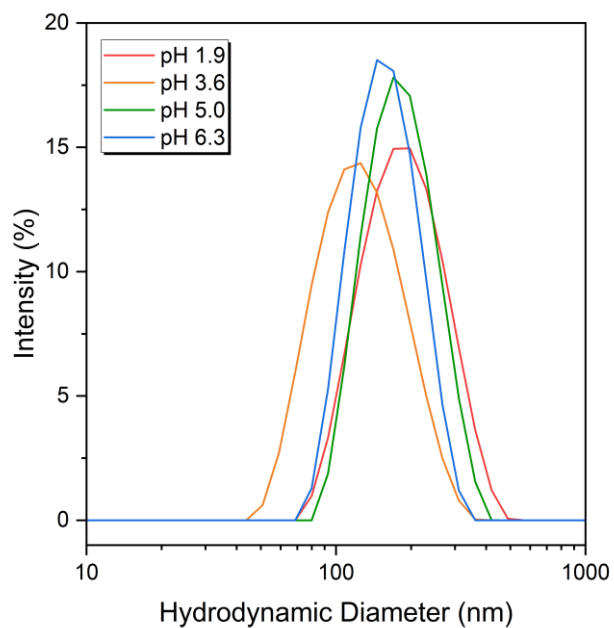

Figure S4. Dynamic light scattering intensity distributions of Ce particle batches synthesized at the indicated pHs. Data were collected on the day the particles were harvested.

Table S2.  $Z_{avg}$ , polydispersity index (PDI), and zeta potential values corresponding to the samples displayed in Figure 1 and Figure S4.

| <b>Synthesis pH</b> | <b><math>Z_{avg} \pm 2\sigma</math> (nm)</b> | <b><math>PDI \pm 2\sigma</math></b> | <b>Zeta Potential (mV)</b> |
|---------------------|----------------------------------------------|-------------------------------------|----------------------------|
| <b>1.9</b>          | $175 \pm 2$                                  | $0.103 \pm 0.033$                   | +28.8                      |
| <b>3.6</b>          | $115 \pm 1$                                  | $0.112 \pm 0.023$                   | +40.0                      |
| <b>5.0</b>          | $172 \pm 2$                                  | $0.0988 \pm 0.0363$                 | +35.5                      |
| <b>6.3</b>          | $149 \pm 3$                                  | $0.0807 \pm 0.0596$                 | +55.0                      |

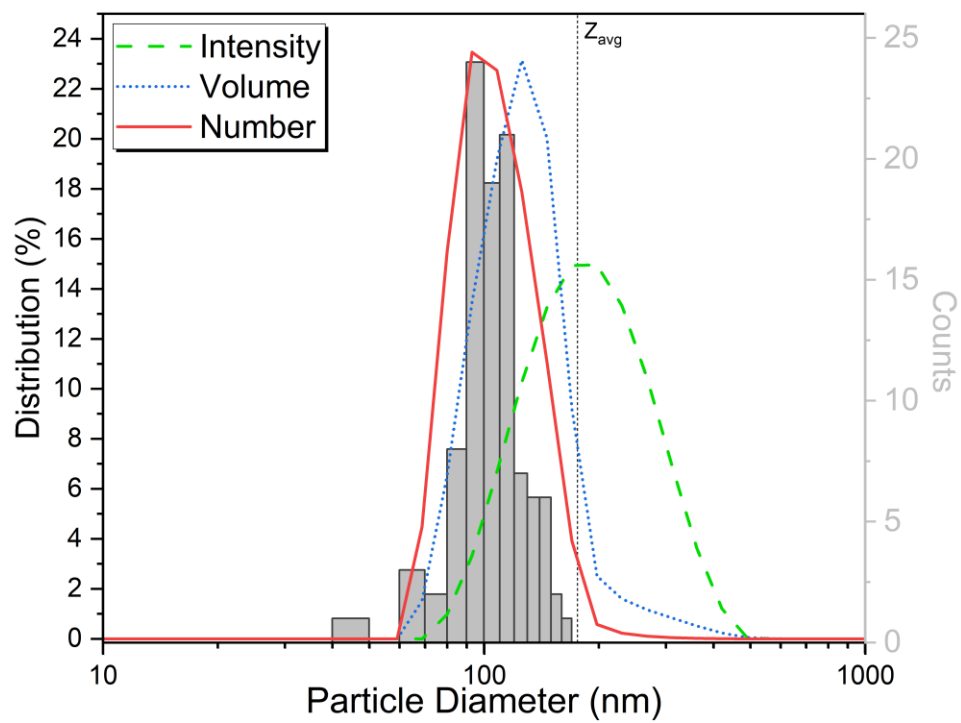

Figure S5. Comparison of the hydrodynamic diameter volume distribution to the particle size distribution determined via scanning electron microscopy.

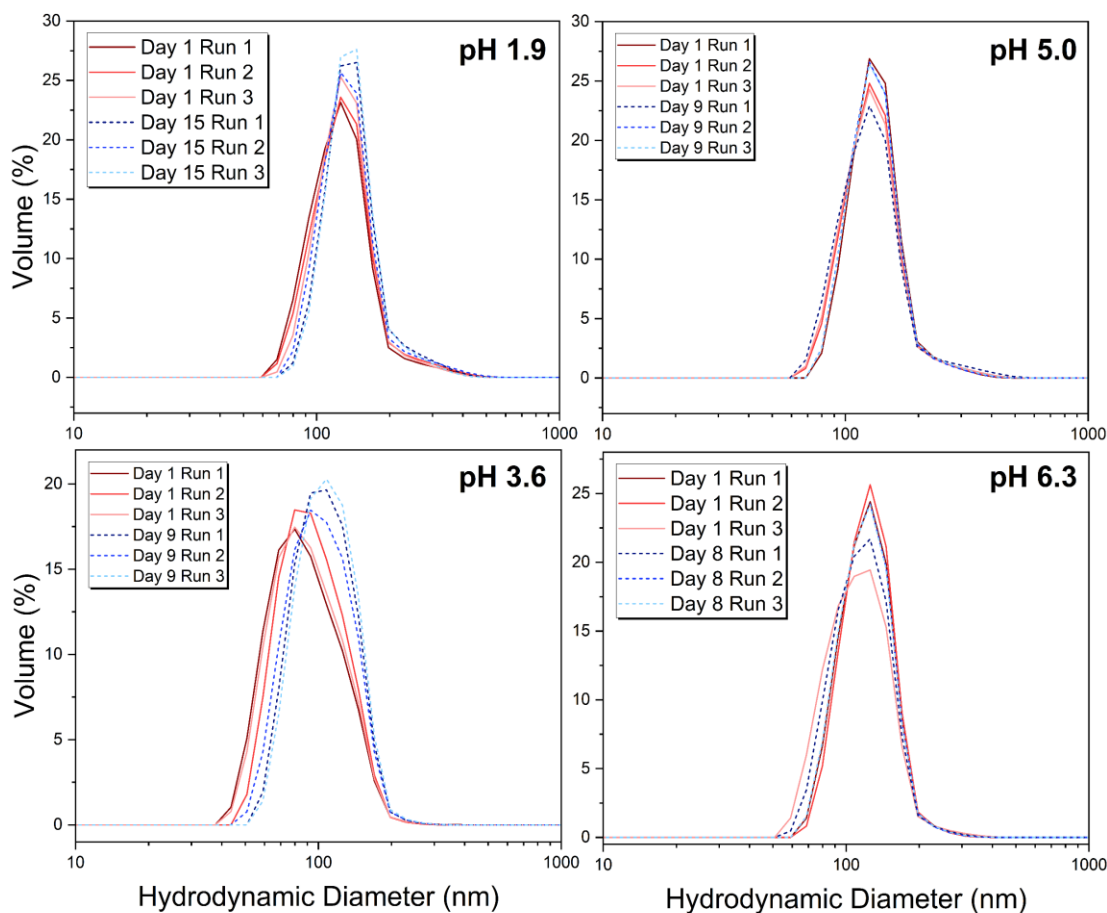

Figure S6. Dynamic light scattering volume distributions of Ce particle batches at the indicated pHs with the initial vs. aged characterization.

Table S3. Comparison of initial and aged  $Z_{\text{avg}}$  values for the Ce particle samples plotted in Figure S6.

| Synthesis pH | Day 1 $Z_{\text{avg}} \pm 2\sigma$ (nm) | Aged $Z_{\text{avg}} \pm 2\sigma$ (nm) |
|--------------|-----------------------------------------|----------------------------------------|
| <b>1.9</b>   | $175 \pm 2$                             | $184 \pm 4$                            |
| <b>3.6</b>   | $115 \pm 1$                             | $128 \pm 4$                            |
| <b>5.0</b>   | $172 \pm 2$                             | $174 \pm 10$                           |
| <b>6.3</b>   | $149 \pm 3$                             | $148 \pm 1$                            |

Table S4. Comparison of initial and aged polydispersity indexes for the Ce particle samples plotted in Figure S6.

| Synthesis pH | Day 1 PDI $\pm 2\sigma$ | Aged PDI $\pm 2\sigma$ |
|--------------|-------------------------|------------------------|
| <b>1.9</b>   | $0.103 \pm 0.033$       | $0.0792 \pm 0.0517$    |
| <b>3.6</b>   | $0.112 \pm 0.023$       | $0.0765 \pm 0.0133$    |
| <b>5.0</b>   | $0.0988 \pm 0.0363$     | $0.0993 \pm 0.0185$    |
| <b>6.3</b>   | $0.0807 \pm 0.0596$     | $0.0712 \pm 0.0169$    |

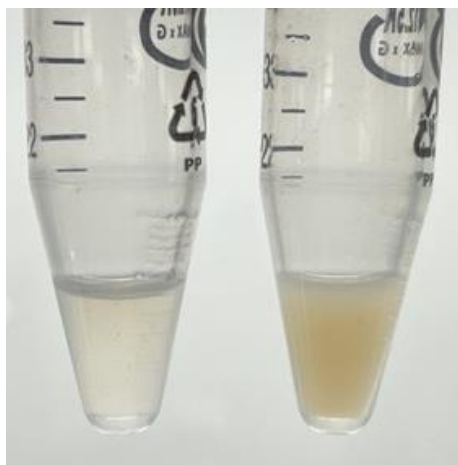

Figure S7. Comparison of relatively dilute (left) and relatively concentrated (right) Ce particle suspensions.

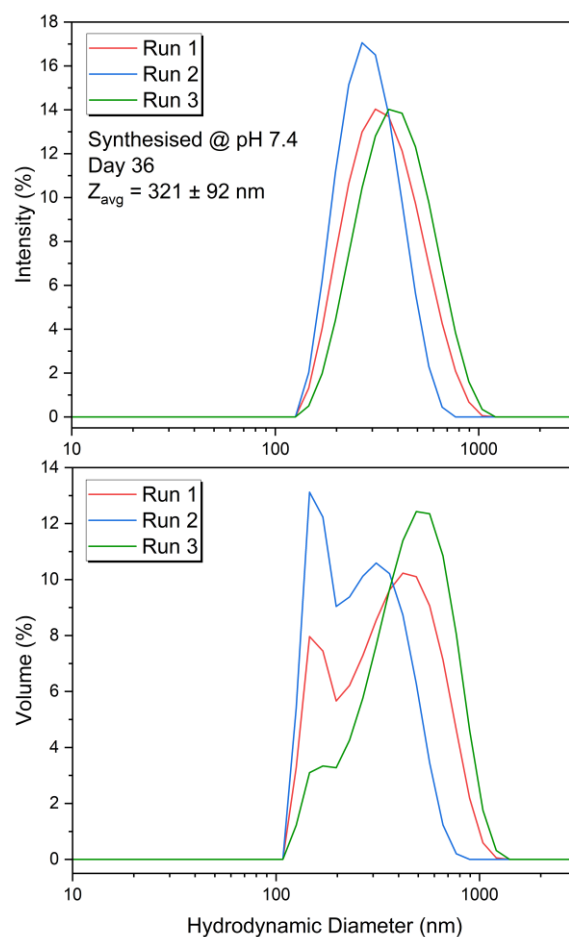

Figure S8. Intensity (top) and volume (bottom) distributions of the same Ce particle batch that reveals multiple particle populations due to incomplete dispersion via ultrasonication during sample preparation.



Table S5. Quantities of the additives explored with the Ce particle suspensions. The indicated amounts were added to 100  $\mu\text{L}$  of the Ce particle batch in ethanol.

| Additive                                  | Volume ( $\mu\text{L}$ ) | Comment                       |
|-------------------------------------------|--------------------------|-------------------------------|
| Acetylacetone (acac)                      | 5                        | 5% v                          |
| Darvan 821A                               | $\sim 1$                 | 1% v, viscous                 |
| Polyethyleneimine (PEI, 800 MW, branched) | $\sim 1$                 | 1% v, viscous                 |
| H <sub>2</sub> O                          | 12.5                     | Control for aqueous additives |
| Urea (4 M)                                | 12.5                     | Molar eq. to acac             |
| Citric acid (4 M)                         | 12.5                     | Molar eq. to acac             |

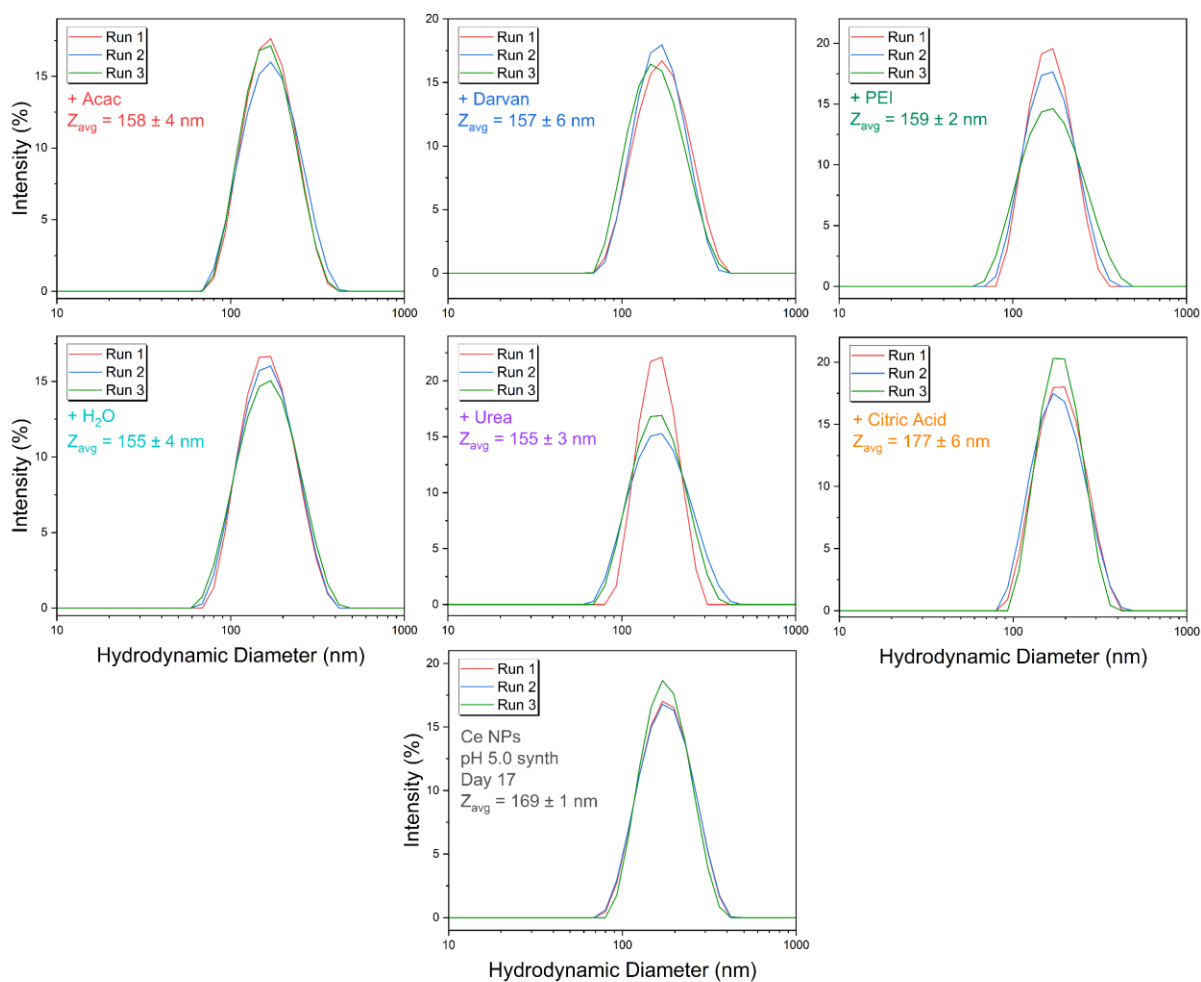

Figure S9. The intensity distribution plots for the indicated additives with a Ce particle batch that was synthesized at pH 5.0.

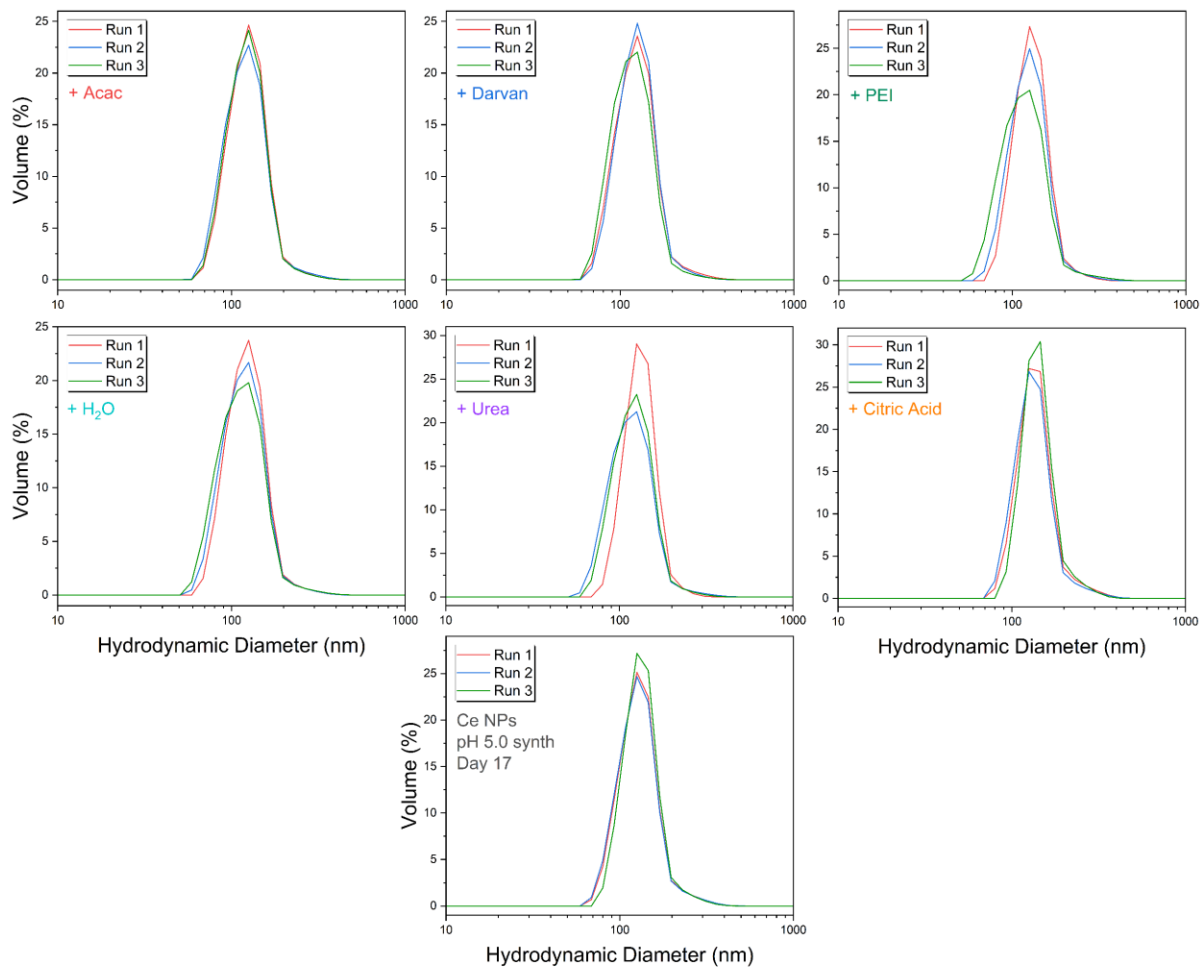

Figure S10. The volume distribution plots for the indicated additives with a Ce particle batch that was synthesized at pH 5.0.

Table S6. DLS and zeta potential results from the Ce particle additive study.

| <b>Sample</b>           | <b><math>Z_{\text{avg}} \pm 2\sigma</math> (nm)</b> | <b><math>\text{PDI} \pm 2\sigma</math></b> | <b><math>\text{Zeta Potential} \pm 2\sigma</math> (mV)</b> |
|-------------------------|-----------------------------------------------------|--------------------------------------------|------------------------------------------------------------|
| <b>Control 1</b>        | 169 ± 1                                             | 0.0834 ± 0.0210                            | +44.1 ± 3.3                                                |
| <b>+ Acac</b>           | 158 ± 4                                             | 0.0952 ± 0.0038                            | +42.5 ± 2.4                                                |
| <b>+ Darvan</b>         | 157 ± 6                                             | 0.110 ± 0.063                              | -48.2 ± 2.5                                                |
| <b>+ PEI</b>            | 159 ± 2                                             | 0.121 ± 0.099                              | +30.6 ± 1.6                                                |
| <b>+ H<sub>2</sub>O</b> | 155 ± 4                                             | 0.111 ± 0.013                              | +45.0 ± 2.4                                                |
| <b>+ Urea</b>           | 155 ± 3                                             | 0.0758 ± 0.0738                            | +44.0 ± 1.8                                                |
| <b>+ Citric Acid</b>    | 177 ± 6                                             | 0.0753 ± 0.0429                            | +9.19 ± 1.43                                               |
| <b>Control 2</b>        | 158 ± 1                                             | 0.120 ± 0.005                              | +54.7 ± 4.3                                                |
